# Supplementary material for: Enterococcus faecalis Prophage Dynamics and Contributions to Pathogenic Traits
Source: PubMed Central journal article supplement (PMC3675006; doi:10.1371/journal.pgen.1003539), 2013-06-06

Figure S4

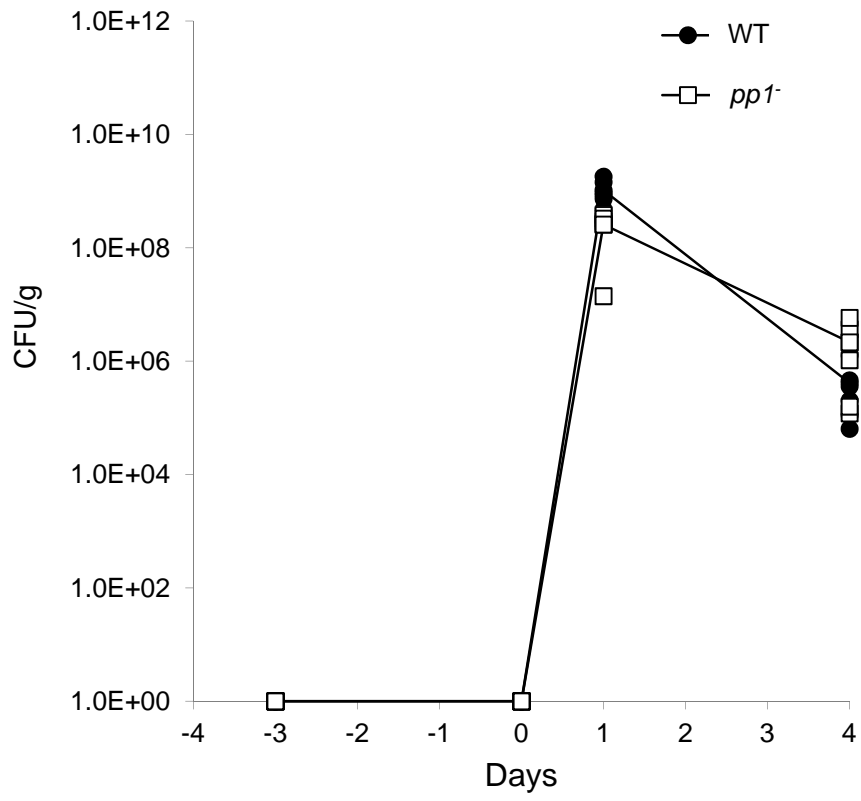

Supplement: pgen.1003539.s004.pdf [file pgen.1003539.s004.pdf]
